# Supplementary material for: Two Novel Sesquiterpenoid Glycosides from the Rhizomes of Atractylodes lancea
Source: MDPI journal article supplement (doi:10.3390/molecules27185753), 2022-09-06
Supplement: s1 [file s1]

Two novel sesquiterpenoid glycosides from the Rhizomes of *Atractylodes lancea* (Thunb.) DC.

**Lanying Liu**<sup>1,†</sup>, **Fuqin Guan**<sup>2,†</sup>, **Yu Chen**<sup>2</sup>, **Fan Wang**<sup>2,3</sup>, **Pengxu Chen**<sup>2,3</sup>, **Min Yin**<sup>2</sup>, **Bi Wang**<sup>2</sup>, **Linwei Li**<sup>2,\*</sup>, **Qizhi Wang**<sup>2,\*</sup>, **Yonghua Gu**<sup>2,\*</sup> and **Xu Feng**<sup>2,3</sup>

<sup>1</sup> National Wolfberry Engineering Technology Research Center, Ningxia Academy of Agriculture and Forestry Sciences, Yinchuan 750002, China

<sup>2</sup> Jiangsu Key Laboratory for the Research and Utilization of Plant Resources, Jiangsu Province Engineering Research Center of Eco-cultivation and High-value Utilization of Chinese Medicinal Materials, Institute of Botany, Jiangsu Province and Chinese Academy of Sciences, Nanjing 210014, China

<sup>3</sup> College of Pharmacy, Nanjing University of Chinese Medicine, Nanjing 210023, China

\* Correspondence: xt\_llw@163.com (L.L.); wangqizhi@cnbg.net (Q.W.); guyhua@cnbg.net (Y.G.)

† These authors contributed equally to this work.

1. **Figure S1** ESI-HRMS spectrum compound of **1**
2. **Figure S2**  $^{13}\text{C}$ -NMR spectrum of compound **1**
3. **Figure S3**  $^1\text{H}$ -NMR spectrum of compound **1**
4. **Figure S4** HSQC spectrum of compound **1**
5. **Figure S5** HMBC spectrum of compound **1**
6. **Figure S6** ROESY spectrum of compound **1**
7. **Figure S7** CD spectrum of compound **1**
8. **Figure S8** ESI-HRMS spectrum of compound **2**
9. **Figure S9**  $^{13}\text{C}$ -NMR spectrum of compound **2**
10. **Figure S10**  $^1\text{H}$ -NMR spectrum of compound **2**
11. **Figure S11** HSQC spectrum of compound **2**
12. **Figure S12** HMBC spectrum of compound **2**
13. **Figure S13** ROESY spectrum of compound **2**
14. **Figure S14** CD spectrum of compound **2**
15. **Figure S15**  $^{13}\text{C}$ -NMR spectrum of compound **3**
16. **Figure S16**  $^{13}\text{C}$ -NMR spectrum of compound **4**
17. **Figure S17**  $^{13}\text{C}$ -NMR spectrum of compound **5**
18. **Figure S18**  $^{13}\text{C}$ -NMR spectrum of compound **6**
19. **Figure S19**  $^{13}\text{C}$ -NMR spectrum of compound **7**
20. **Table S1.** The top 50 potential drug targets of compound **1**
21. **Table S2.** The gene function analysis of top 50 candidate targets for compound **1**
22. **Table S3.** KEGG pathway enrichment of top 50 candidate targets for compound **1**
23. **Table S4.** The top 10 involved indications of top 50 candidate targets for compound **1**

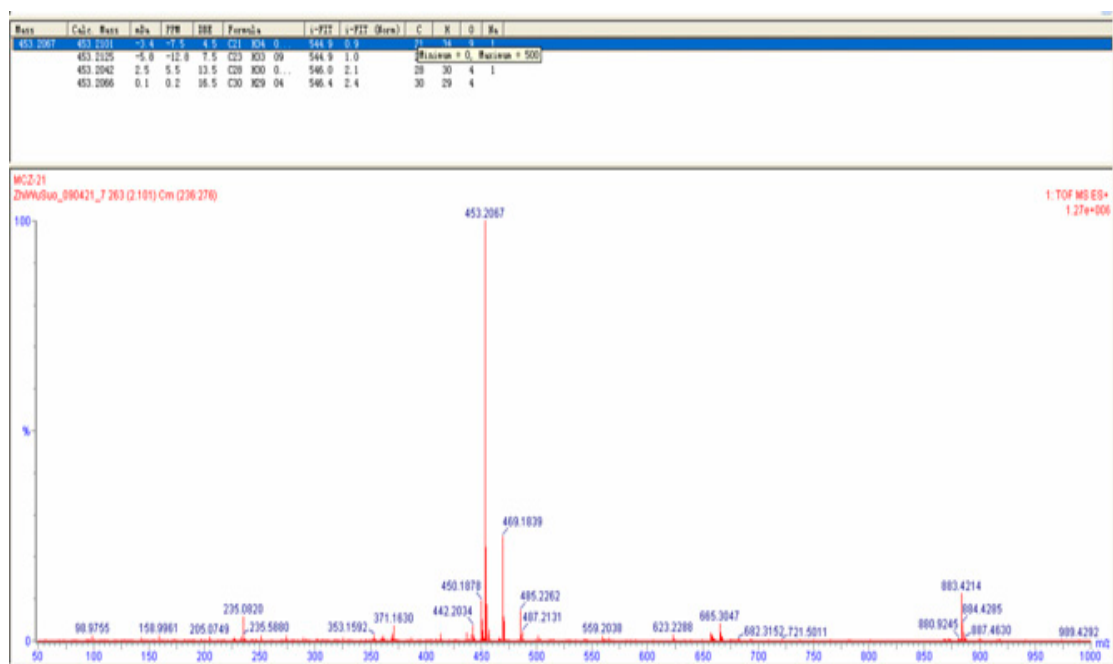

Figure S1 ESI-HRMS spectrum compound of 1

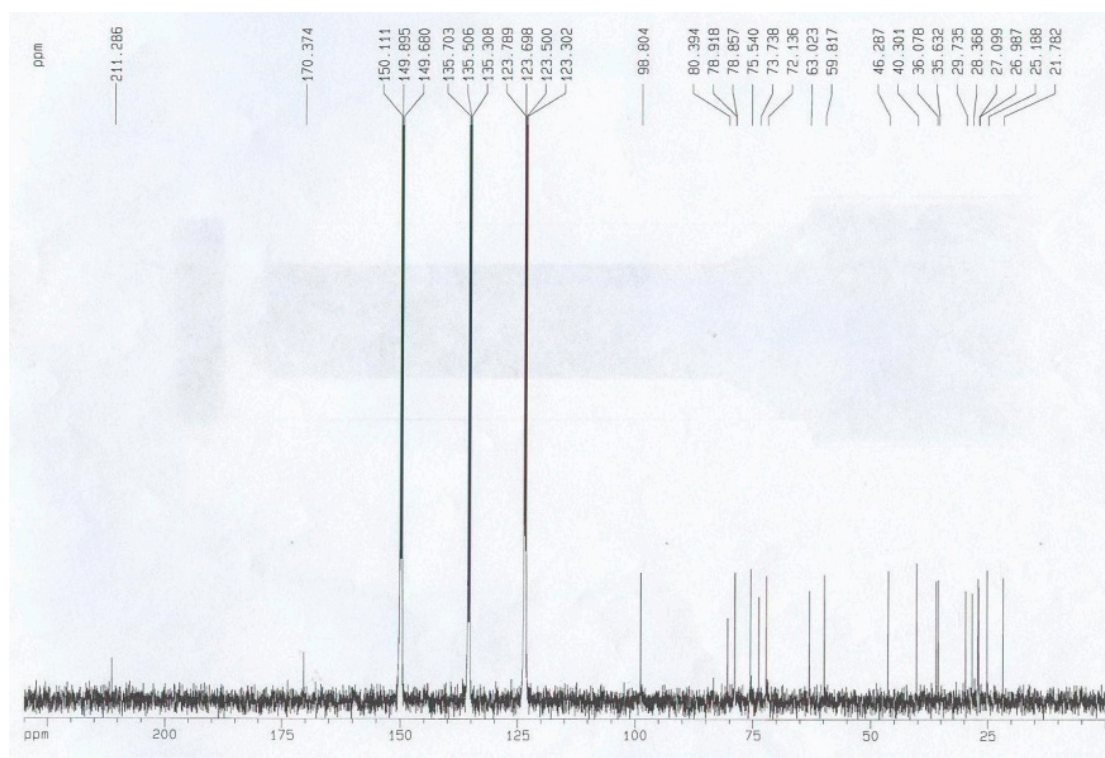

Figure S2  $^{13}\text{C}$ -NMR spectrum of compound 1

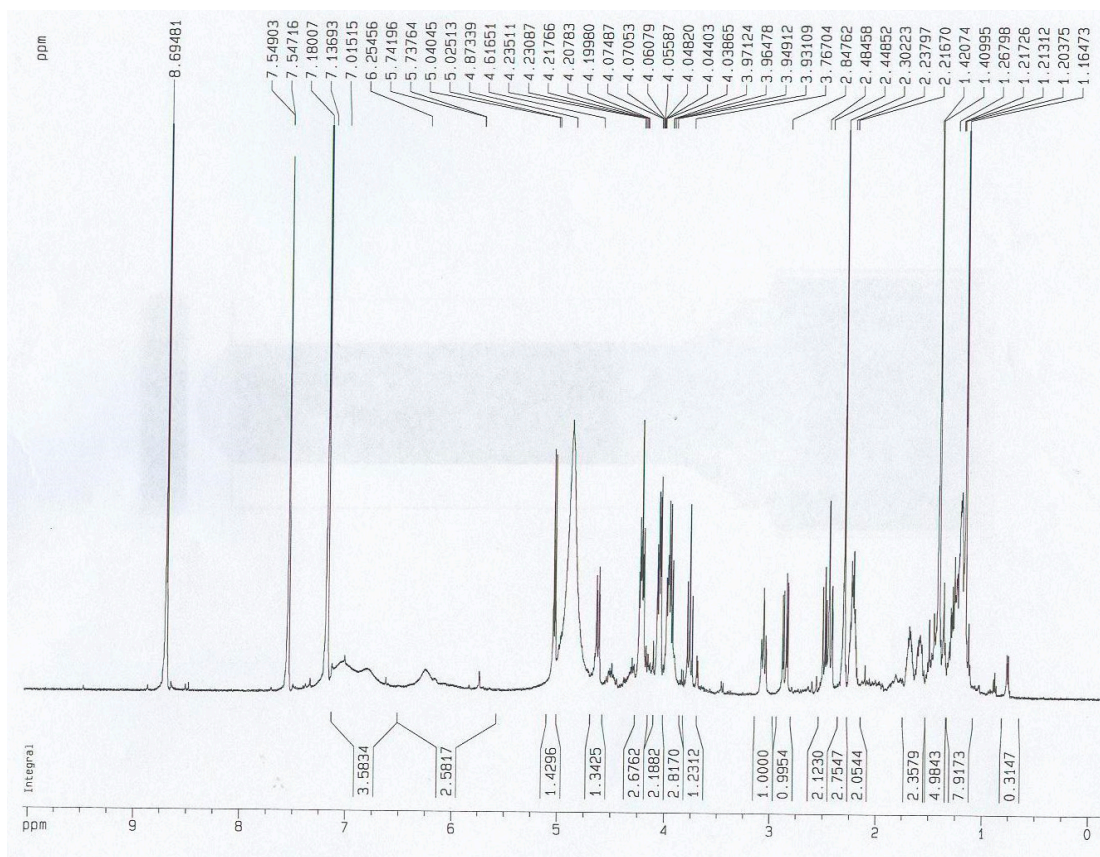

Figure S3 <sup>1</sup>H-NMR spectrum of compound 1

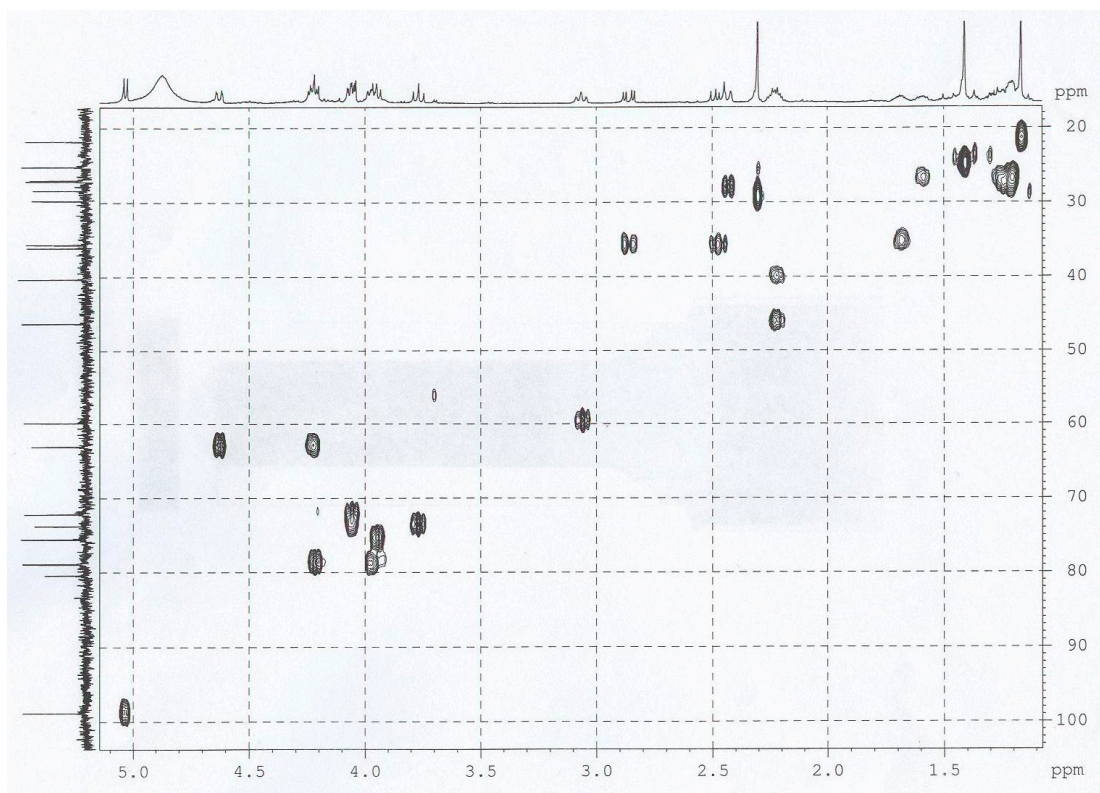

Figure S4 HSQC spectrum of compound 1



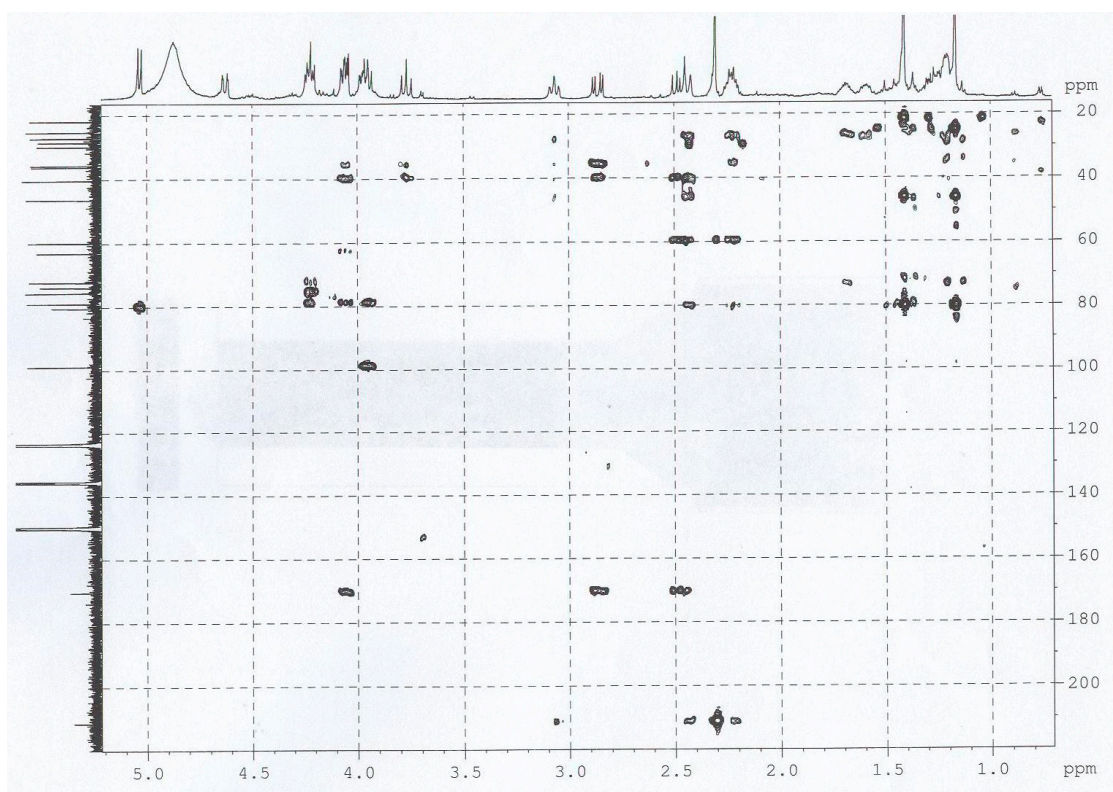

**Figure S5** HMBC spectrum of compound **1**

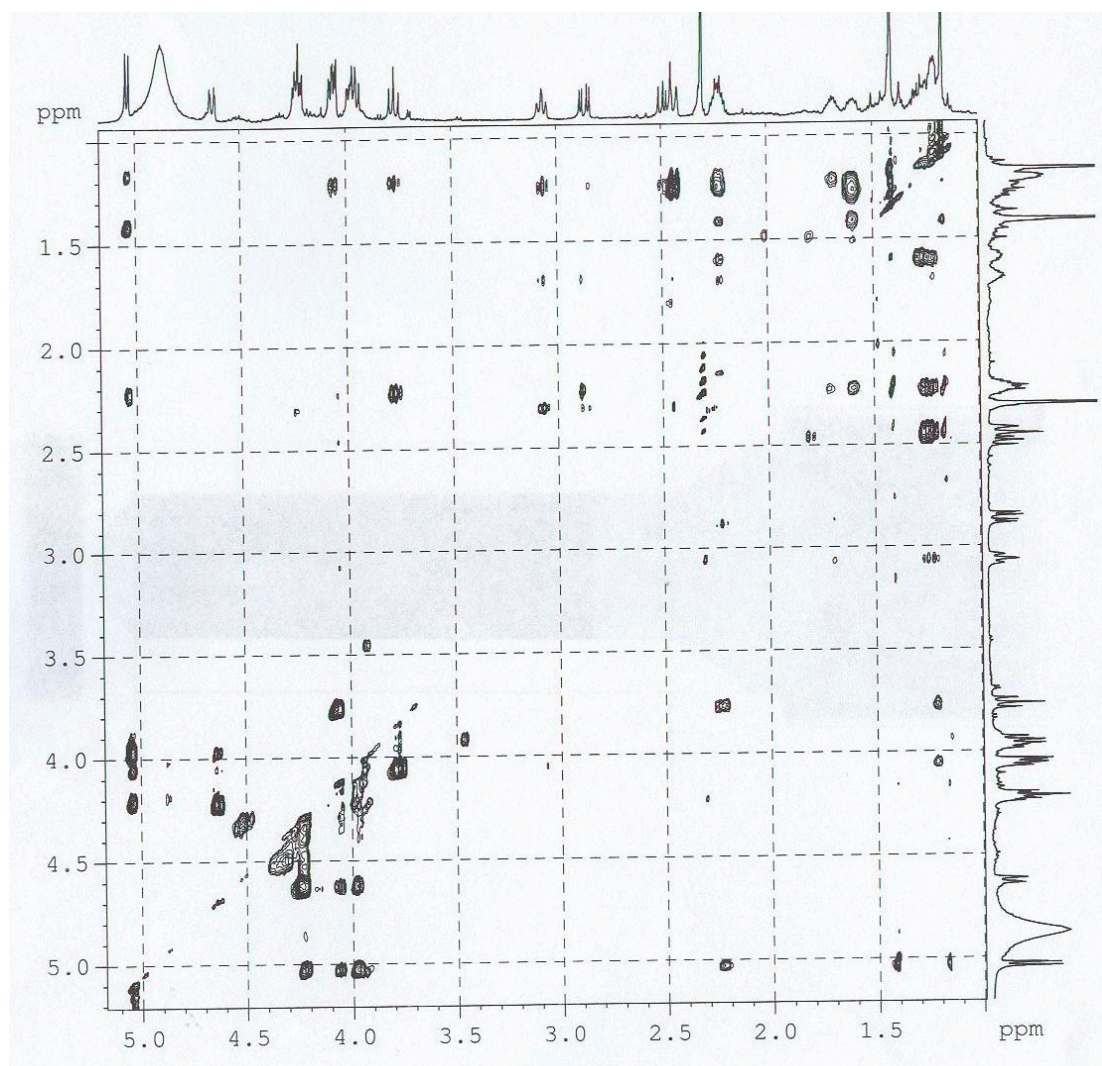

**Figure S6** ROESY spectrum of compound **1**

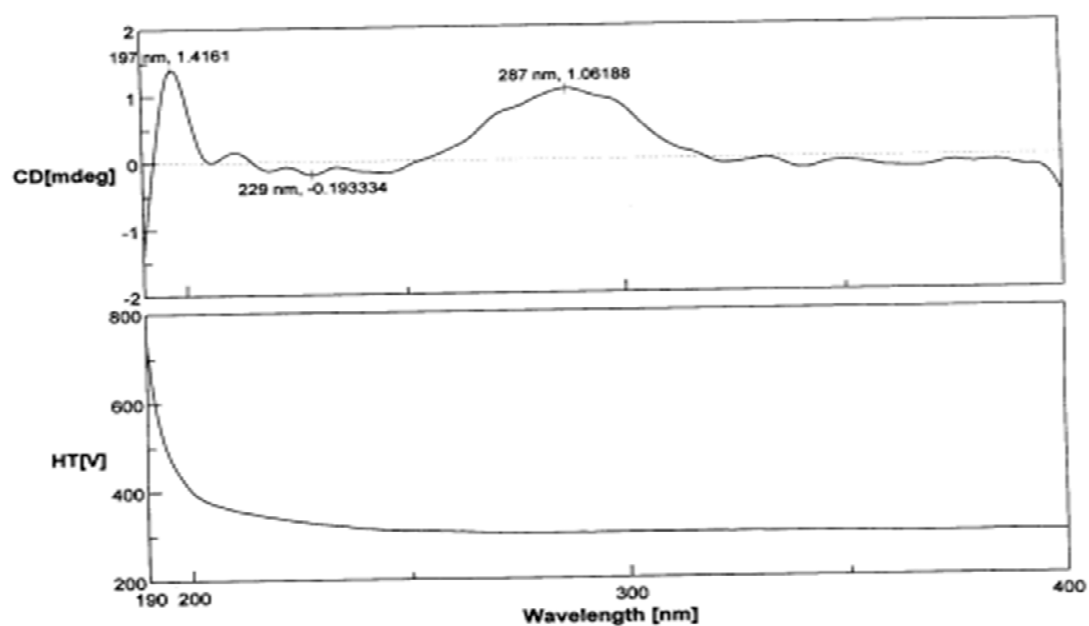

|                   |                  |
|-------------------|------------------|
| Date              | 2009-5-18 15:24  |
| File name         | MCZ-21s.jws      |
| Model             | J-810            |
| Serial No.        | B027760750       |
| Band width        | 1 nm             |
| Response          | 1 sec            |
| Sensitivity       | Standard         |
| Measurement range | 400 - 190 nm     |
| Data pitch        | 1nm              |
| Scanning speed    | 100 nm/min       |
| Accumulation      | 3                |
| Cell Length       | 0.05 cm          |
| Concentration     | 1 (w/v)%         |
| Solvent           | MeOH             |
| Temperature       | Room Temperature |
| Sample name       | MCZ-21           |
| Operator          | Lin              |
| Comment           |                  |

Figure S7 CD spectrum of compound 1



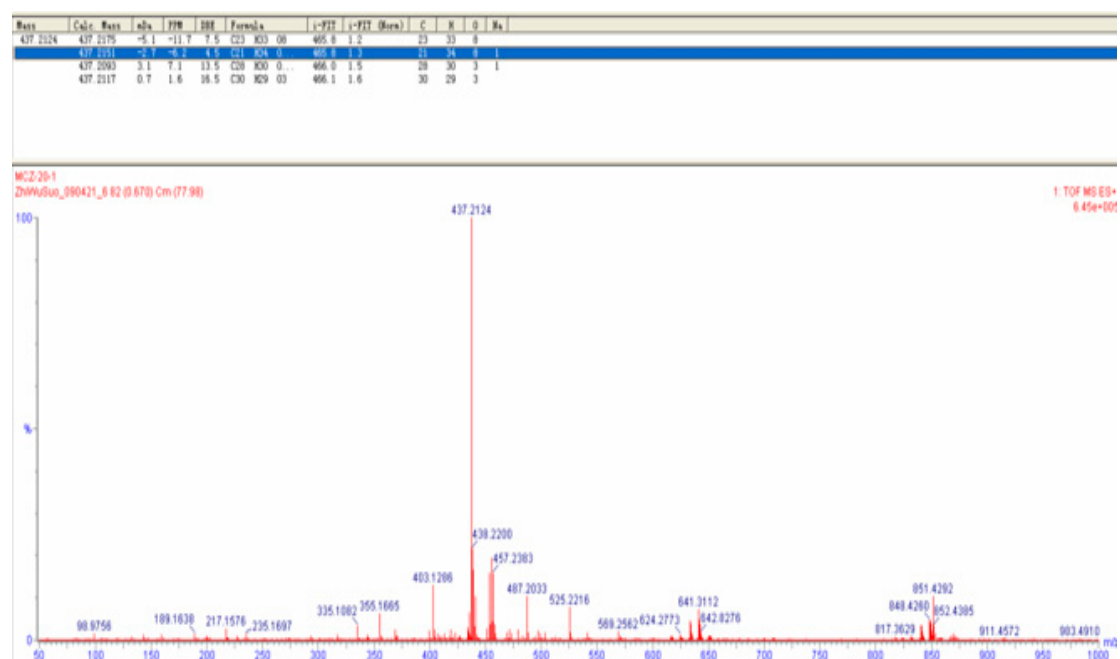

**Figure S8** ESI-HRMS spectrum of compound **2**

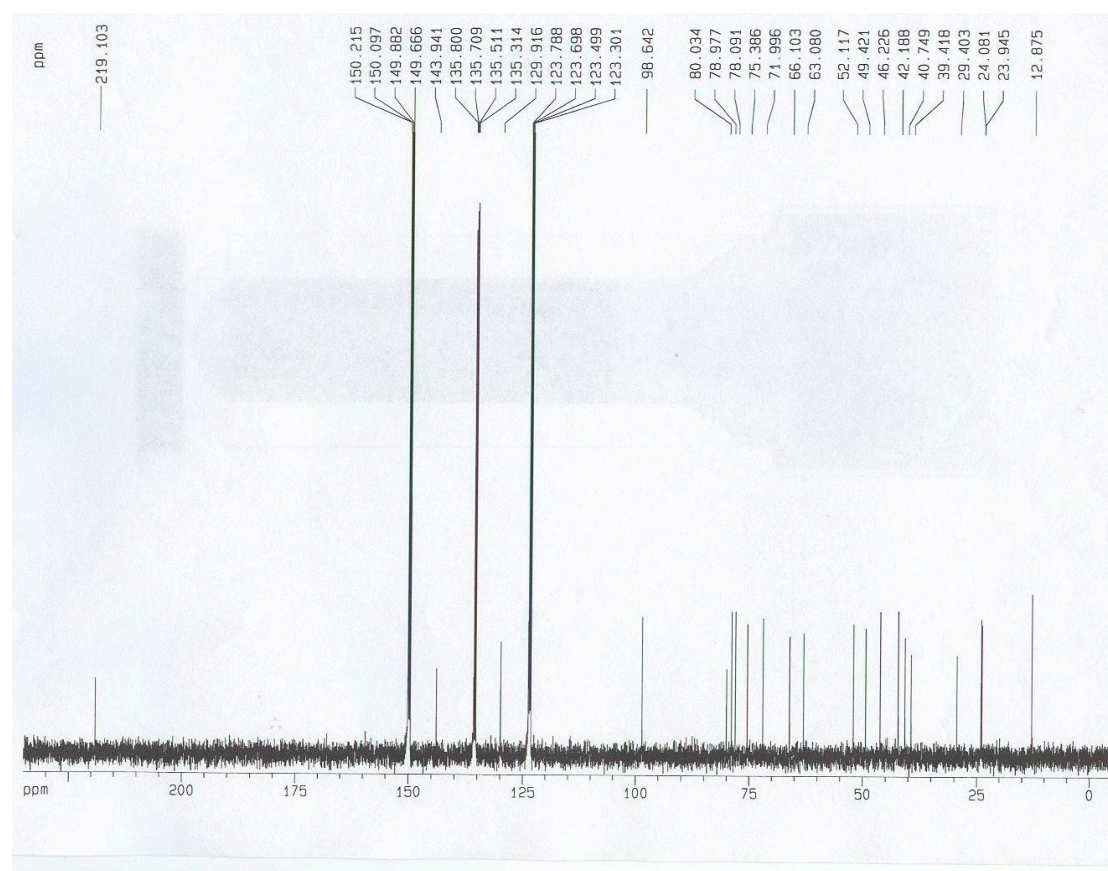

**Figure S9**  $^{13}\text{C}$ -NMR spectrum of compound **2**



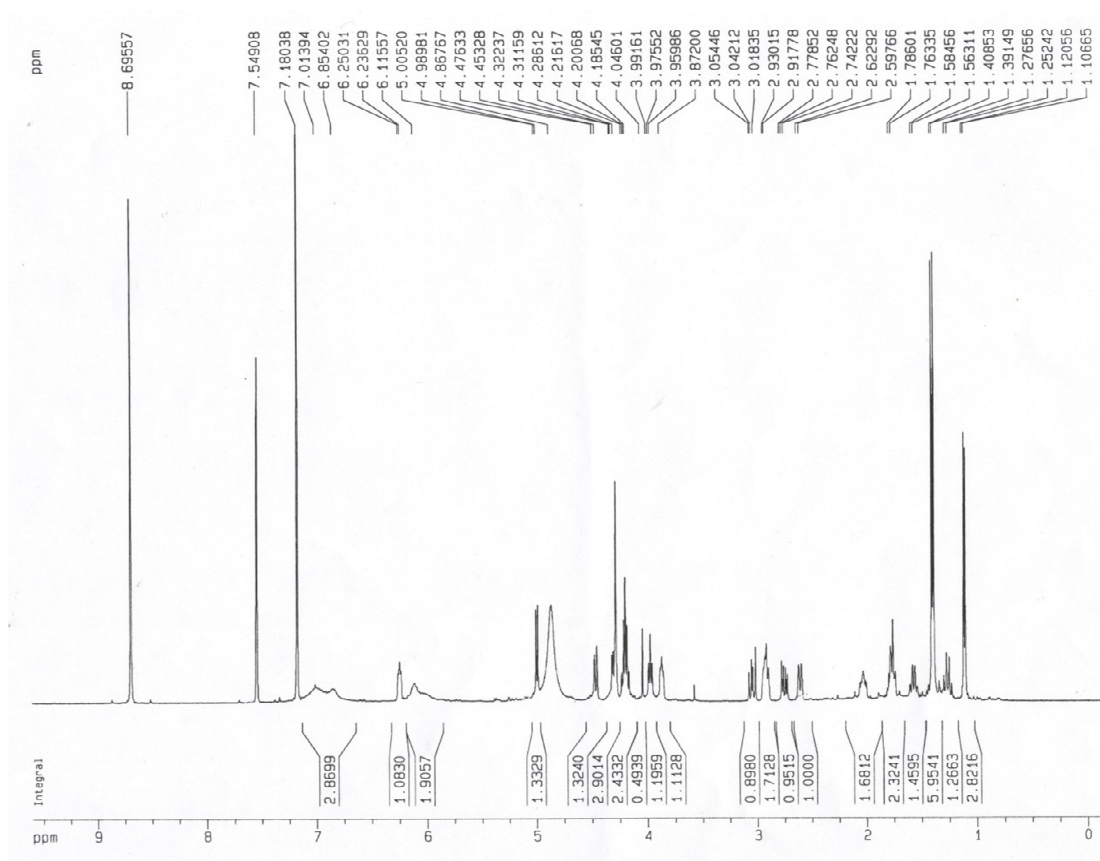

Figure S10 <sup>1</sup>H-NMR spectrum of compound 2

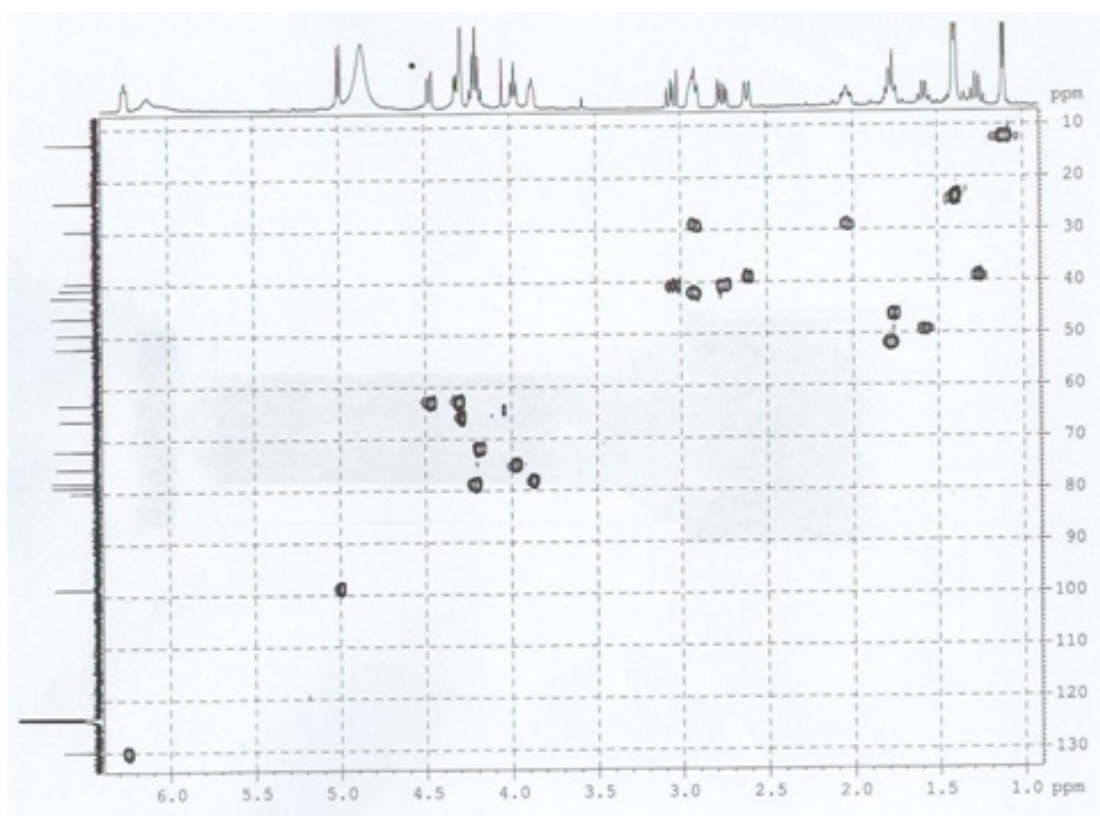

**Figure S11** HSQC spectrum of compound **2**

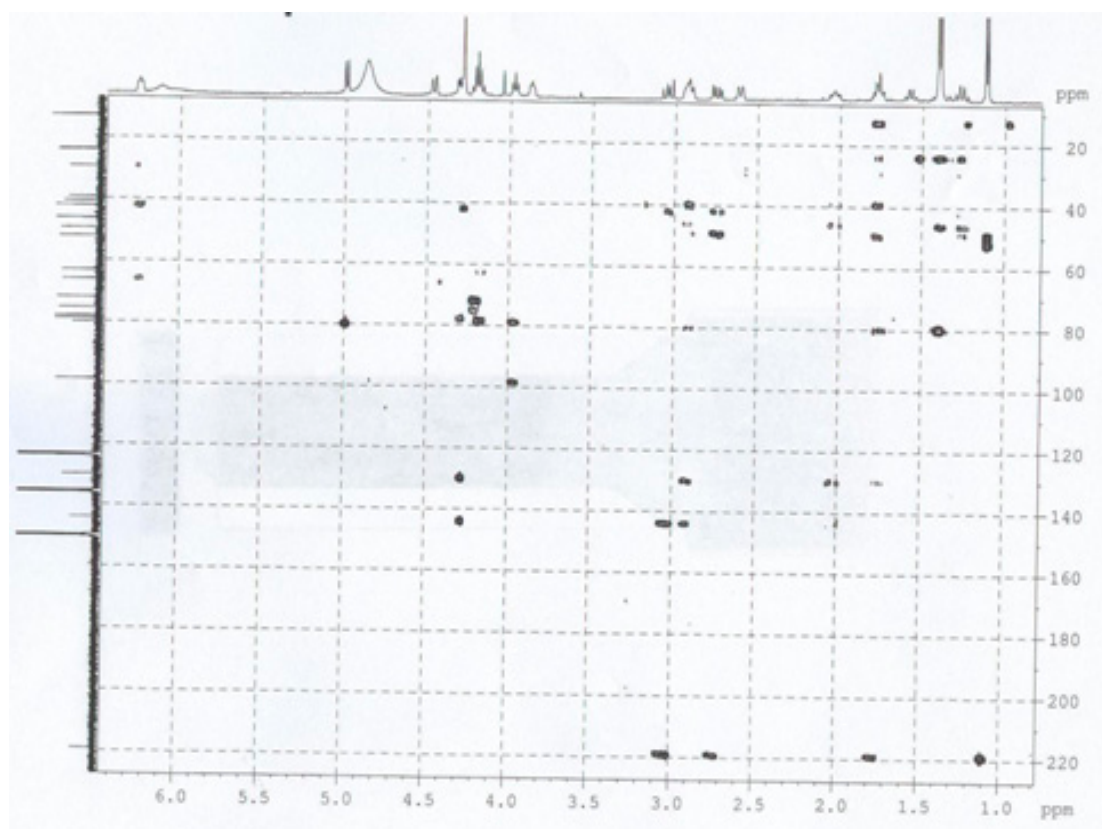

**Figure S12** HMBC spectrum of compound **2**

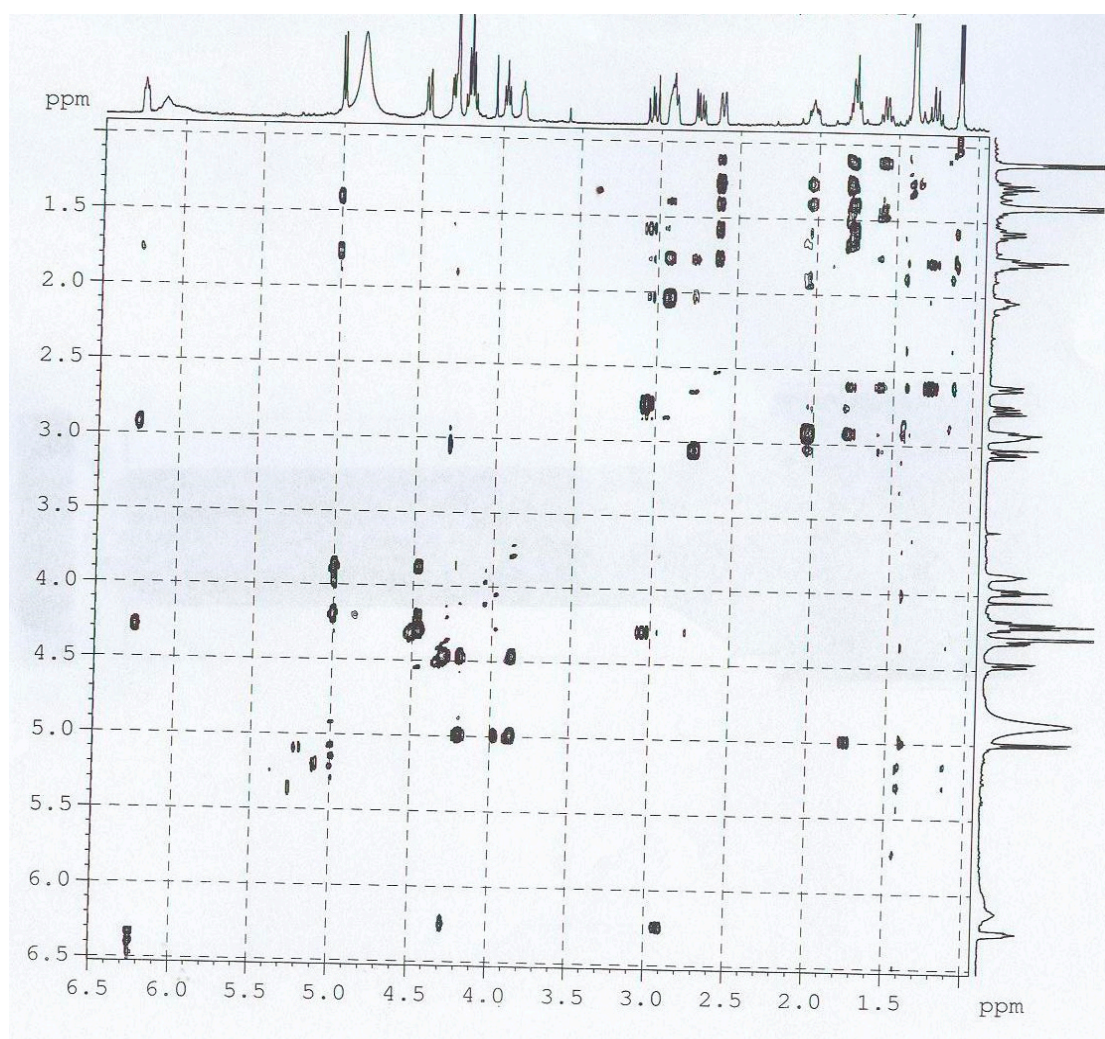

**Figure S13** ROESY spectrum of compound **2**

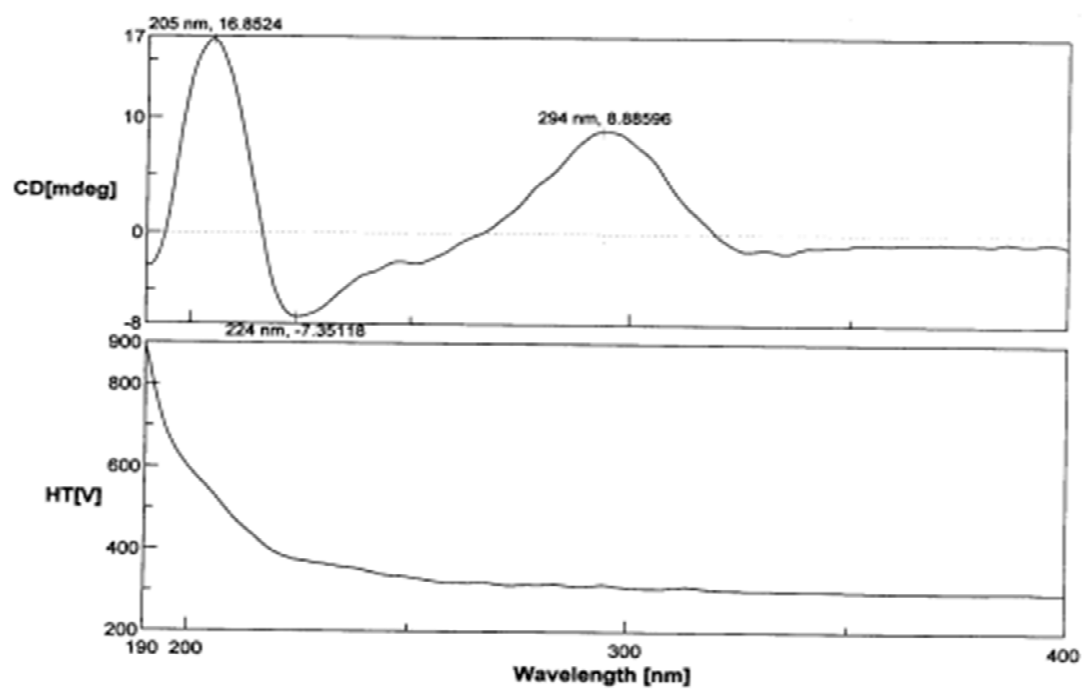

Figure S14 CD spectrum of compound 2



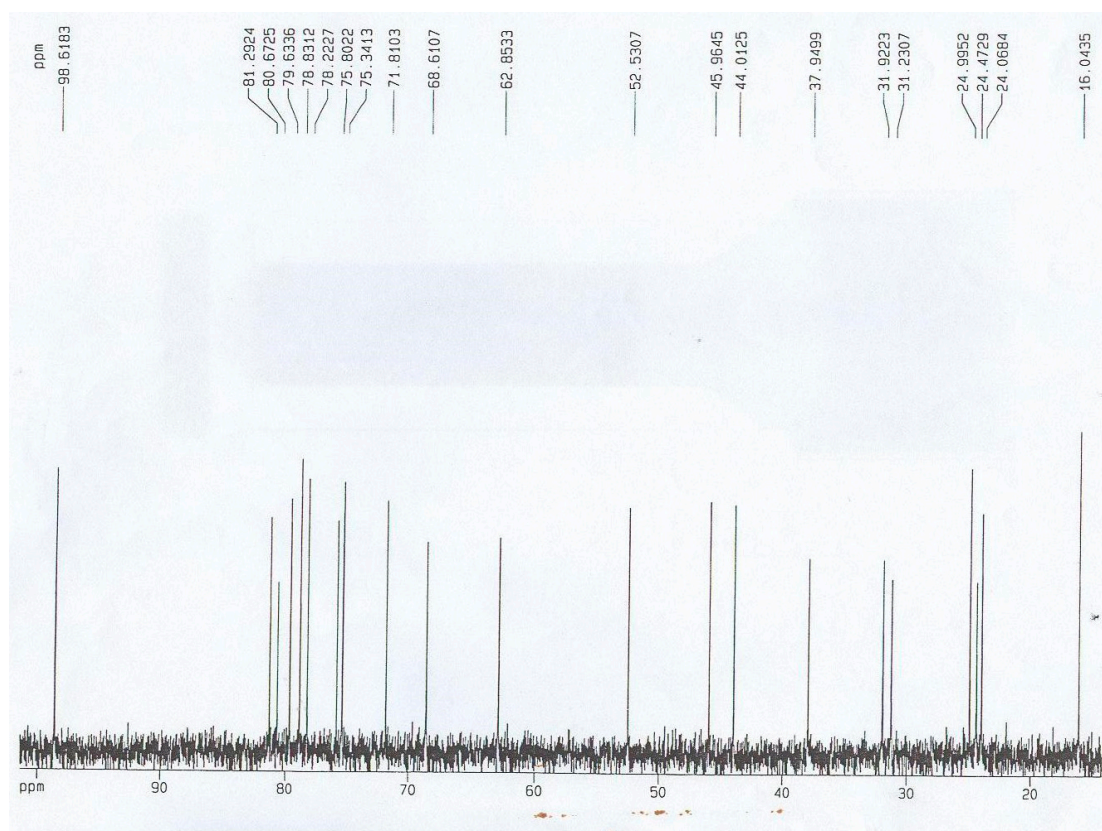

**Figure S15** <sup>13</sup>C-NMR spectrum of compound 3

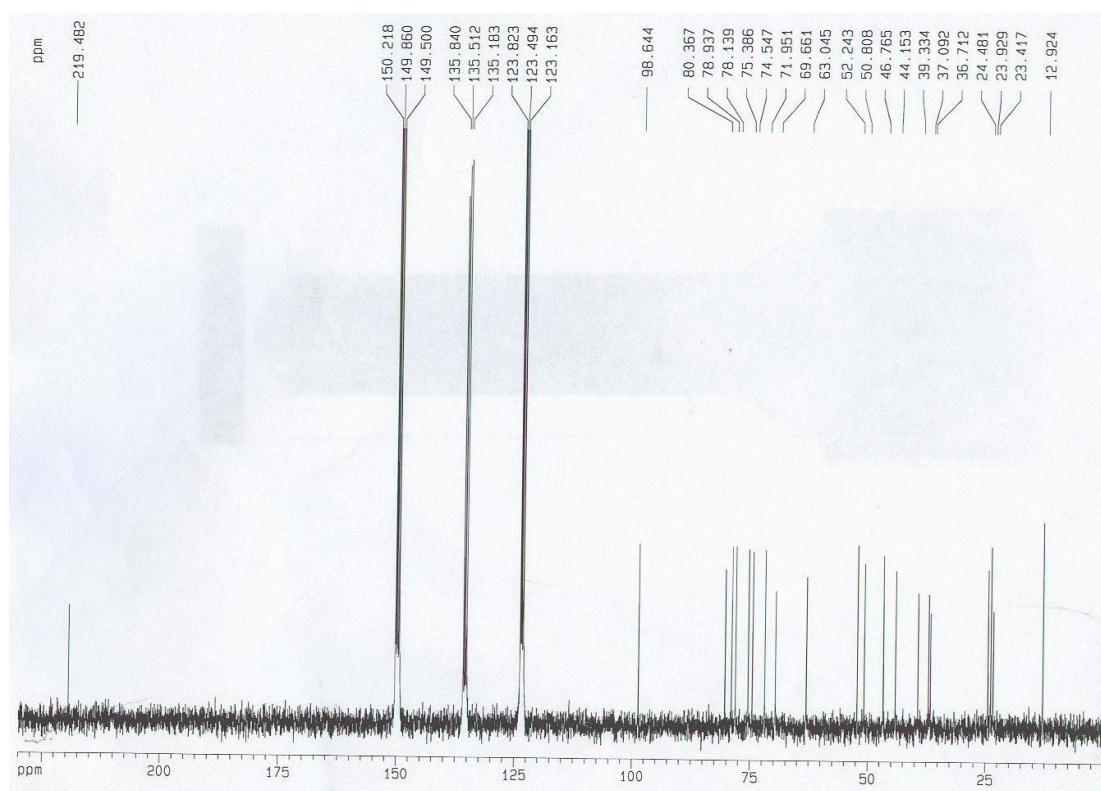

**Figure S16** <sup>13</sup>C-NMR spectrum of compound 4



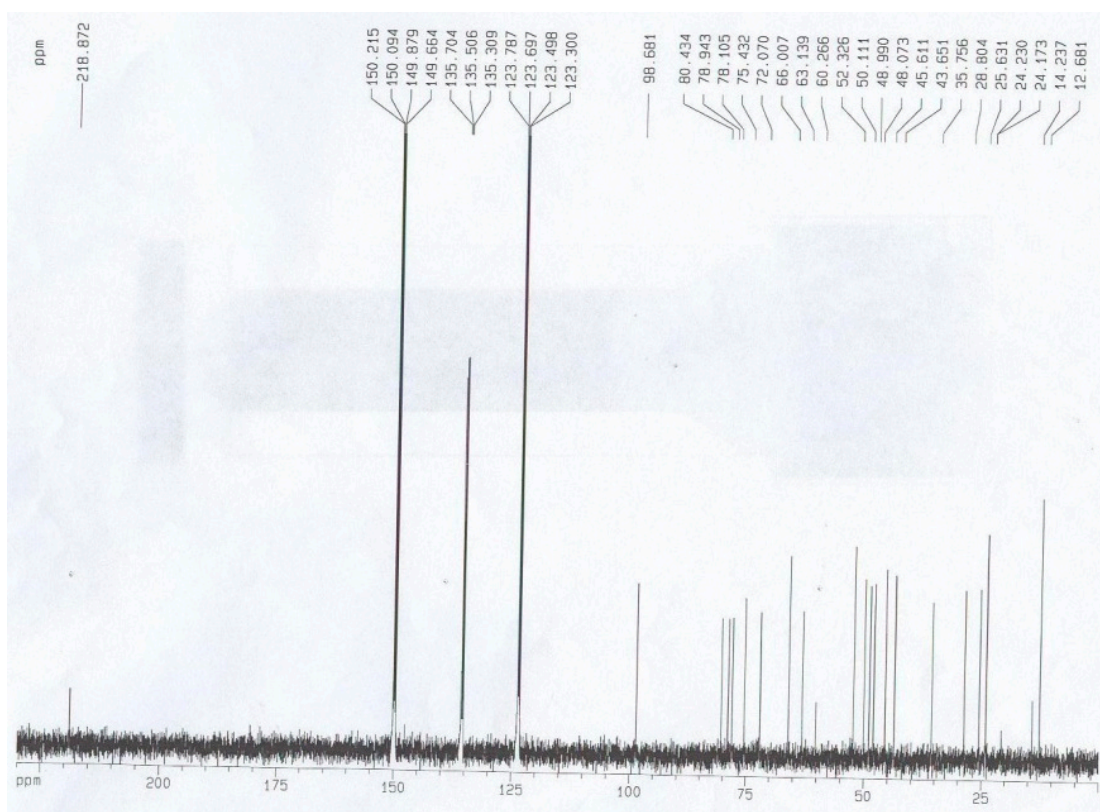

**Figure S17** <sup>13</sup>C-NMR spectrum of compound 5

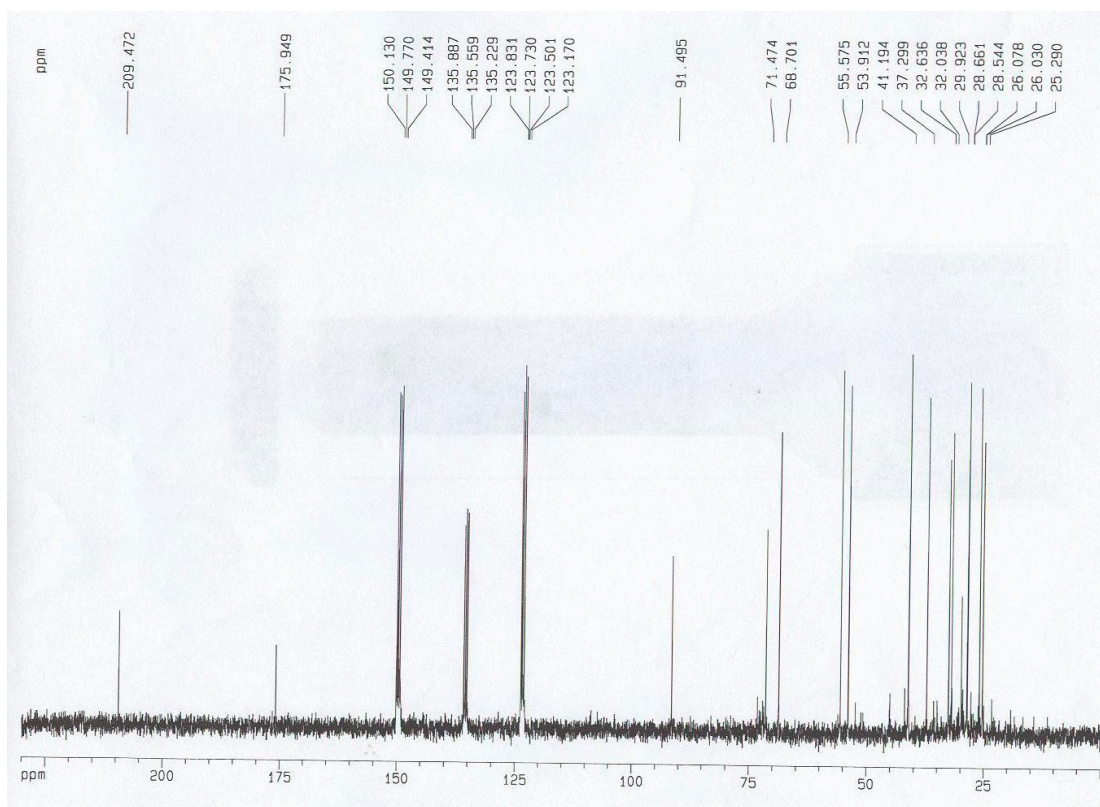

**Figure S18** <sup>13</sup>C-NMR spectrum of compound 6

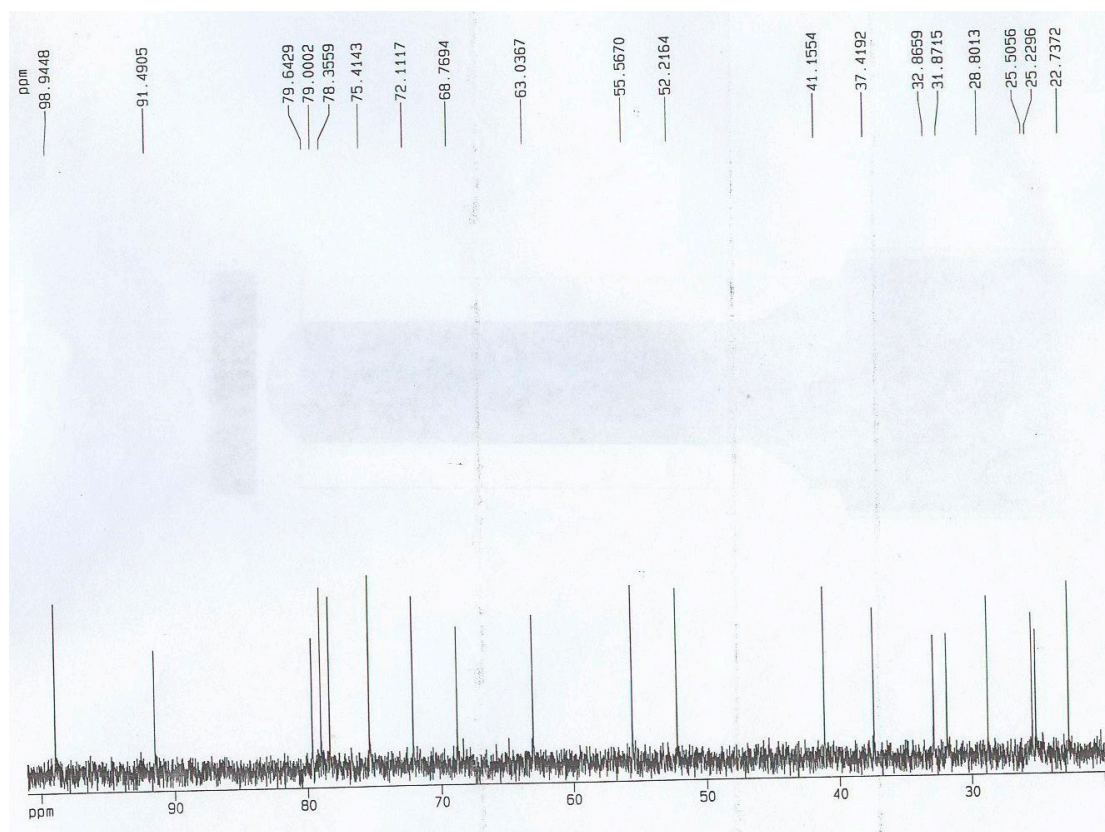

**Figure S19** <sup>13</sup>C-NMR spectrum of compound 7

**Table S1.** The top 50 potential drug targets of compound **1**

|          | <i>Z</i> -score | Fit   | Name                                                 | Gene<br>Symbol | Function                                                                                                                                                                                                                                                                                | Idication                                                                                                                                                                                   |
|----------|-----------------|-------|------------------------------------------------------|----------------|-----------------------------------------------------------------------------------------------------------------------------------------------------------------------------------------------------------------------------------------------------------------------------------------|---------------------------------------------------------------------------------------------------------------------------------------------------------------------------------------------|
| <b>1</b> | 4.15289         | 3.843 | C-1-<br>tetrahydrofolate<br>synthase,<br>cytoplasmic | MTHFD1         | Nucleotide transport and<br>metabolism                                                                                                                                                                                                                                                  | For nutritional supplementation, also for<br>treating dietary shortage or imbalance.                                                                                                        |
| <b>2</b> | 3.05957         | 3.794 | Protein S100-A9                                      | S100A9         | Expressed by macrophages in<br>acutely inflammated tissues and<br>in chronic inflammations. Seem<br>to be an inhibitor of protein<br>kinases. Also expressed in<br>epithelial cells constitutively or<br>induced during dermatoses.<br>May interact with components<br>of the intermedi | NONE                                                                                                                                                                                        |
| <b>3</b> | 2.92923         | 3.761 | Cathepsin F                                          | CTSF           | Involved in cysteine-type<br>endopeptidase activity                                                                                                                                                                                                                                     | NONE                                                                                                                                                                                        |
| <b>4</b> | 2.91657         | 3.44  | Cytidine<br>deaminase                                | CDA            | This enzyme scavenge<br>exogenous and endogenous<br>cytidine and 2-deoxycytidine for<br>UMP synthesis.                                                                                                                                                                                  | NONE                                                                                                                                                                                        |
| <b>5</b> | 2.71783         | 3.495 | Uridine-cytidine<br>kinase 2                         | UCK2           | Nucleotide transport and<br>metabolism                                                                                                                                                                                                                                                  | NONE                                                                                                                                                                                        |
| <b>6</b> | 2.64053         | 3.564 | Histone<br>acetyltransferase<br>PCAF                 | KAT2B          | Involved in N-acetyltransferase<br>activity                                                                                                                                                                                                                                             | NONE                                                                                                                                                                                        |
| <b>7</b> | 2.62491         | 3.619 | Sulfotransferase<br>family cytosolic<br>2B member 1  | SULT2B1        | Involved in sulfotransferase<br>activity                                                                                                                                                                                                                                                | NONE                                                                                                                                                                                        |
| <b>8</b> | 2.58506         | 3.482 | Phenylalanine-4-<br>hydroxylase                      | PAH            | NONE                                                                                                                                                                                                                                                                                    | Phenylketonuria;Sickle cell<br>anemia;Vascular disease;Genetic<br>disorder;Diabetic<br>nephropathy;Hypertension;Ataxia;Periphera<br>l arterial occlusive disease;Coronary artery<br>disease |



|    |         |       |                                                                |        |                                                                                                                                                                                                                                                                 |                                         |
|----|---------|-------|----------------------------------------------------------------|--------|-----------------------------------------------------------------------------------------------------------------------------------------------------------------------------------------------------------------------------------------------------------------|-----------------------------------------|
|    |         |       |                                                                |        | Tryptase is the major neutral protease present in mast cells and is secreted upon the coupled activation-degranulation response of this cell type. Has an immunoprotective role during bacterial infection. Required to efficiently combat K.pneumoniae infecti |                                         |
| 9  | 2.56743 | 3.506 | Tryptase beta-2                                                | TPSB2  |                                                                                                                                                                                                                                                                 | NONE                                    |
| 10 | 2.5397  | 3.522 | ADP-ribosyl cyclase 2                                          | BST1   | Synthesizes cyclic ADP-ribose, a second messenger that elicits calcium release from intracellular stores. May be involved in pre-B-cell growth.                                                                                                                 | Hematological neoplasm;Multiple myeloma |
| 11 | 2.52564 | 3.911 | Thymidylate kinase                                             | DTYMK  | Catalyzes the conversion of dTMP to dTDP.                                                                                                                                                                                                                       | NONE                                    |
| 12 | 2.45288 | 3.583 | Methionine aminopeptidase 2                                    | MAP2   | Removes the amino-terminal methionine from nascent proteins.                                                                                                                                                                                                    | NONE                                    |
| 13 | 2.45033 | 3.504 | Signal transducer and activator of transcription 1- alpha/beta | STAT1  | Signal transducer and activator of transcription that mediates signaling by interferons (IFNs). Following type I IFN (IFN-alpha and IFN-beta) binding to cell surface receptors, Jak kinases (TYK2 and JAK1) are activated, leading to tyrosine phosphorylation | Respiratory disease;Asthma              |
| 14 | 2.37538 | 3.493 | Glucosamine-6-phosphate isomerase                              | GNPDA1 | Carbohydrate transport and metabolism                                                                                                                                                                                                                           | NONE                                    |
| 15 | 2.20187 | 4.096 | Histidine triad nucleotide-binding protein 1                   | HINT1  | Hydrolyzes adenosine 5-monophosphoramidate substrates such as AMP-morpholidate, AMP-N-alanine methyl ester, AMP-alpha- acetyl lysine methyl ester and AMP-NH2 (By similarity).                                                                                  | NONE                                    |
| 16 | 2.14521 | 3.384 | Glycogen synthase kinase-3 beta                                | GSK3B  | Involved in protein kinase activity                                                                                                                                                                                                                             | NONE                                    |

|    |         |       |                                               |       |                                                                                                                                                                                                                                                                                                                                                                                                   |                       |
|----|---------|-------|-----------------------------------------------|-------|---------------------------------------------------------------------------------------------------------------------------------------------------------------------------------------------------------------------------------------------------------------------------------------------------------------------------------------------------------------------------------------------------|-----------------------|
| 17 | 2.05188 | 3.66  | Dihydroorotate dehydrogenase, mitochondrial   | DHODH | NONE                                                                                                                                                                                                                                                                                                                                                                                              | NONE                  |
| 18 | 1.97644 | 3.767 | GMP reductase 2                               | GMPR2 | Catalyzes the irreversible NADPH-dependent deamination of GMP to IMP. It functions in the conversion of nucleobase, nucleoside and nucleotide derivatives of G to A nucleotides, and in maintaining the intracellular balance of A and G nucleotides (PubMed:12009299, PubMed:12669231, PubMed:16359702, PubMed:22037469). Plays a role in modulating cellular differentiation (PubMed:12669231). | NONE                  |
| 19 | 1.82894 | 3.266 | Fructose-bisphosphate aldolase A              | ALDOA | NONE                                                                                                                                                                                                                                                                                                                                                                                              | NONE                  |
| 20 | 1.82601 | 3.446 | Sorbitol dehydrogenase                        | SORD  | NONE                                                                                                                                                                                                                                                                                                                                                                                              | Diabetic complication |
| 21 | 1.68656 | 3.188 | Superoxide dismutase [Mn], mitochondrial      | SOD2  | Destroys superoxide anion radicals which are normally produced within the cells and which are toxic to biological systems.                                                                                                                                                                                                                                                                        | NONE                  |
| 22 | 1.67957 | 3.174 | 3-phosphoinositide-dependent protein kinase 1 | PDPK1 | Phosphorylates and activates not only PKB/AKT, but also PKA, PKC-zeta, RPS6KA1 and RPS6KB1. May play a general role in signaling processes and in development (By similarity). Isoform 3 is catalytically inactive.                                                                                                                                                                               | NONE                  |

|    |         |       |                                            |        |                                                                                                                                                                                                                                                                 |                                                                                                                                                                       |
|----|---------|-------|--------------------------------------------|--------|-----------------------------------------------------------------------------------------------------------------------------------------------------------------------------------------------------------------------------------------------------------------|-----------------------------------------------------------------------------------------------------------------------------------------------------------------------|
|    |         |       |                                            |        | Catalyzes the irreversible NADPH-dependent deamination of GMP to IMP. It functions in the conversion of nucleobase, nucleoside and nucleotide derivatives of G to A nucleotides, and in maintaining the intracellular balance of A and G nucleotides.           |                                                                                                                                                                       |
| 23 | 1.67755 | 3.797 | GMP reductase 1                            | GMPR   |                                                                                                                                                                                                                                                                 | NONE                                                                                                                                                                  |
| 24 | 1.64325 | 4.018 | Apoptotic protease-activating factor 1     | APAF1  | Oligomeric Apaf-1 mediates the cytochrome c-dependent autocatalytic activation of pro-caspase-9 (Apaf-3), leading to the activation of caspase-3 and apoptosis. This activation requires ATP. Isoform 6 is less effective in inducing apoptosis.                | NONE                                                                                                                                                                  |
| 25 | 1.62737 | 3.824 | Glucose-6-phosphate isomerase              | GPI    | Neurotrophic factor for spinal and sensory neurons.                                                                                                                                                                                                             | NONE                                                                                                                                                                  |
| 26 | 1.62243 | 3.356 | Hexokinase-1                               | HK1    | NONE                                                                                                                                                                                                                                                            | NONE                                                                                                                                                                  |
| 27 | 1.58443 | 3.578 | Glutathione S-transferase A3               | GSTA3  | Involved in glutathione transferase activity                                                                                                                                                                                                                    | For nutritional supplementation, also for treating dietary shortage or imbalance                                                                                      |
| 28 | 1.52038 | 3.352 | Matrix metalloproteinase-9                 | MMP9   | May play an essential role in local proteolysis of the extracellular matrix and in leukocyte migration. Could play a role in bone osteoclastic resorption. Cleaves KiSS1 at a Gly-                                                                              | Defects in MMP9 may be a cause of susceptibility to lumbar disk herniation (LDH) [MIM:603932]. LDH is the predominant cause of low-back pain and unilateral leg pain. |
| 29 | 1.44093 | 3.386 | GTPase HRas                                | HRAS   | Ras proteins bind GDP/GTP and possess intrinsic GTPase activity.                                                                                                                                                                                                | NONE                                                                                                                                                                  |
| 30 | 1.42362 | 3.645 | Peptidyl-prolyl cis-trans isomerase FKBP1A | FKBP1A | May play a role in modulation of ryanodine receptor isoform-1 (RYR-1), a component of the calcium release channel of skeletal muscle sarcoplasmic reticulum. There are four molecules of FKBP12 per skeletal muscle RYR. PPIases accelerate the folding of prot | NONE                                                                                                                                                                  |

|    |         |       |                                               |       |                                                                                                                                                                                                                                                                   |      |
|----|---------|-------|-----------------------------------------------|-------|-------------------------------------------------------------------------------------------------------------------------------------------------------------------------------------------------------------------------------------------------------------------|------|
| 31 | 1.40476 | 3.791 | Protein-glutamine gamma-glutamyltransferase E | TGM3  | Catalyzes the cross-linking of proteins and the conjugation of polyamines to proteins. It is responsible for the later stages of cell envelope formation in the epidermis and the hair follicle.                                                                  | NONE |
| 32 | 1.37708 | 3.734 | Angiotensin-converting enzyme                 | ACE2  | Converts angiotensin I to angiotensin II by release of the terminal His-Leu, this results in an increase of the vasoconstrictor activity of angiotensin. Also able to inactivate bradykinin, a potent vasodilator. Has also a glycosidase activity which releases | NONE |
| 33 | 1.30646 | 3.36  | Glutathione S-transferase Mu 2                | GSTM2 | Conjugation of reduced glutathione to a wide number of exogenous and endogenous hydrophobic electrophiles. Hydrolyzes an epoxide moiety of leukotriene A4 (LTA-4) to form leukotriene B4 (LTB-4). The enzyme also has some peptidase activity.                    | NONE |
| 34 | 1.24774 | 3.435 | Leukotriene A-4 hydrolase                     | LTA4H | Inflammation;Cancer;Acute myelogenous leukemia;Myocardial infarction;Non-small-cell lung cancer;Solid tumor                                                                                                                                                       |      |
| 35 | 1.21816 | 3.542 | Pyruvate kinase isozymes R/L ADP-             | PKLR  | NONE                                                                                                                                                                                                                                                              | NONE |
| 36 | 1.15182 | 3.356 | ribosylation factor-like protein 5A           | ARL5A | Involved in GTP binding                                                                                                                                                                                                                                           | NONE |
| 37 | 1.15044 | 2.952 | BAG family molecular chaperone regulator 1    | BAG1  | Inhibits the chaperone activity of HSP70/HSC70 by promoting substrate release. Inhibits the pro-apoptotic function of PPP1R15A, and has anti-apoptotic activity. Markedly increases the anti-cell death function of BCL2 induced by various stimuli.              | NONE |



|    |         |       |                                        |        |                                                                                                                                                                                                                                                                |                                                                                                  |
|----|---------|-------|----------------------------------------|--------|----------------------------------------------------------------------------------------------------------------------------------------------------------------------------------------------------------------------------------------------------------------|--------------------------------------------------------------------------------------------------|
| 38 | 1.12543 | 2.956 | Stromelysin-1                          | MMP3   | Can degrade fibronectin, laminin, gelatins of type I, III, IV, and V; collagens III, IV, X, and IX, and cartilage proteoglycans. Activates procollagenase.                                                                                                     | NONE                                                                                             |
| 39 | 1.11831 | 3.874 | Aldo-keto reductase family 1 member C2 | AKR1C2 | Works in concert with the 5-alpha/5-beta-steroid reductases to convert steroid hormones into the 3-alpha/5-alpha and 3-alpha/5-beta-tetrahydrosteroids. Catalyzes the inactivation of the most potent androgen 5-alpha-dihydrotestosterone (5-alpha-DHT) to 5- | NONE                                                                                             |
| 40 | 1.10238 | 2.949 | Cyclin-T1                              | CCNT1  | Regulatory subunit of the cyclin-dependent kinase pair (CDK9/cyclin-T1) complex, also called positive transcription elongation factor B (P-TEFb), which is proposed to facilitate the transition from abortive to productive elongation by phosphorylating the | NONE                                                                                             |
| 41 | 1.09507 | 2.964 | Cathepsin G                            | CTSG   | Serine protease with trypsin- and chymotrypsin-like specificity.                                                                                                                                                                                               | Connective tissue disease;Viral infection;Inflammation;HIV infection                             |
| 42 | 1.06213 | 2.922 | P-selectin                             | SELP   | Ca(2+)-dependent receptor for myeloid cells that binds to carbohydrates on neutrophils and monocytes. Mediates the interaction of activated endothelial cells or platelets with leukocytes. The ligand recognized is sialyl-Lewis X. Mediates rapid rolling of | Sickle cell anemia;Inflammation;Transplant rejection;Myocardial infarction;Restenosis;Thrombosis |
| 43 | 1.03062 | 2.995 | Platelet glycoprotein Ib alpha chain   | GP1BA  | Involved in protein binding                                                                                                                                                                                                                                    | NONE                                                                                             |

|    |          |       |                                       |       |                                                                                                                                                                                                                                                                                                                                                                                                                                                                                                                                                                                                                                                     |                                                                                                                 |
|----|----------|-------|---------------------------------------|-------|-----------------------------------------------------------------------------------------------------------------------------------------------------------------------------------------------------------------------------------------------------------------------------------------------------------------------------------------------------------------------------------------------------------------------------------------------------------------------------------------------------------------------------------------------------------------------------------------------------------------------------------------------------|-----------------------------------------------------------------------------------------------------------------|
| 44 | 1.02122  | 2.939 | Oxysterols<br>receptor LXR-<br>beta   | NR1H2 | Orphan receptor. Binds<br>preferentially to double-<br>stranded oligonucleotide direct<br>repeats having the consensus<br>half-site sequence 5-AGGTCA-<br>3 and 4-nt spacing (DR-4).                                                                                                                                                                                                                                                                                                                                                                                                                                                                | Lipid metabolism disorder;Atherosclerosis                                                                       |
| 45 | 1.0122   | 3.542 | Beta-<br>hexosaminidase<br>beta chain | HEXB  | Carbohydrate transport and<br>metabolism                                                                                                                                                                                                                                                                                                                                                                                                                                                                                                                                                                                                            | NONE                                                                                                            |
| 46 | 1.01201  | 2.916 | Dipeptidyl<br>peptidase 4             | DPP4  | Removes N-terminal dipeptides<br>sequentially from polypeptides<br>having unsubstituted N-termini<br>provided that the penultimate<br>residue is proline. Plays a role in<br>T-cell activation.<br><br>May have a role in maintaining<br>the integrity of the blood<br>vessels. Has growth promoting<br>activity on endothelial cells,<br>angiogenic activity in vivo and<br>chemotactic activity on<br>endothelial cells in<br>vitro.;Catalyzes the reversible<br>phosphorolysis of thymidine.<br>The produced molecules are<br>then utilized as carbon and<br>energy sources or in the rescue<br>of pyrimidine bases for<br>nucleotide synthesis. | Rheumatoid arthritis;Diabetes mellitus;Non-<br>insulin dependent diabetes;Autoimmune<br>disease;Immune disorder |
| 47 | 1.00313  | 2.916 | Thymidine<br>phosphorylase            | TYMP  | Factor D cleaves factor B when<br>the latter is complexed with<br>factor C3b, activating the C3bbb<br>complex, which then becomes<br>the C3 convertase of the<br>alternate pathway. Its function is<br>homologous to that of C1s in<br>the classical pathway.                                                                                                                                                                                                                                                                                                                                                                                       | Angiogenesis disorder;Cancer                                                                                    |
| 48 | 0.993325 | 2.933 | Complement<br>factor D                | CFD   |                                                                                                                                                                                                                                                                                                                                                                                                                                                                                                                                                                                                                                                     | Autoimmune disease;Reperfusion<br>injury;Age related macular degeneration                                       |

|    |          |       |                                               |       |                                                                                                                                                                                                                                                                 |                                                                                                                                                                    |
|----|----------|-------|-----------------------------------------------|-------|-----------------------------------------------------------------------------------------------------------------------------------------------------------------------------------------------------------------------------------------------------------------|--------------------------------------------------------------------------------------------------------------------------------------------------------------------|
| 49 | 0.978927 | 2.897 | Caspase-3                                     | CASP3 | Involved in the activation cascade of caspases responsible for apoptosis execution. At the onset of apoptosis it proteolytically cleaves poly(ADP-ribose) polymerase (PARP) at a 216-Asp-                                                                       | NONE                                                                                                                                                               |
| 50 | 0.975398 | 2.94  | Vascular endothelial growth factor receptor 2 | KDR   | Receptor for VEGF or VEGFC. Has a tyrosine-protein kinase activity. The VEGF-kinase ligand/receptor signaling system plays a key role in vascular development and regulation of vascular permeability. In case of HIV-1 infection, the interaction with extrace | Angiogenesis disorder;Melanoma;Cancer;Non-small-cell lung cancer;Renal cell carcinoma;Colorectal tumor;Ocular disease;Age related macular degeneration;Solid tumor |

**Table S2.** The gene function analysis of top 50 candidate targets for compound **1**

|                    |                                                                      | Gene Number | P-Value     | Genes                                                  | Fold Enrichment | Bonferroni  | Benjamini   | FDR         |
|--------------------|----------------------------------------------------------------------|-------------|-------------|--------------------------------------------------------|-----------------|-------------|-------------|-------------|
| Biological process |                                                                      |             |             |                                                        |                 |             |             |             |
| 1                  | proteolysis                                                          | 9           | 9.00E-05    | DPP4, CFD, TPSB2, CASP3, MMP3, CTSG, LTA4H, CTSF, MMP9 | 6.045120000     | 0.055196482 | 0.018925245 | 0.018805276 |
| 2                  | oxidation-reduction process                                          | 8           | 0.001550296 | MTHFD1, GMPR2, PAH, SORD, GMPR, AKR1C2, SOD2, DHODH    | 4.538378378     | 0.624311842 | 0.141761896 | 0.140863247 |
| 3                  | positive regulation of transcription from RNA polymerase II promoter | 7           | 0.064524723 | KAT2B, GSK3B, CCNT1, STAT1, NR1H2, HEXB, HRAS          | 2.396411825     | 1.000000000 | 1.000000000 | 0.995238095 |
| 4                  | negative regulation of apoptotic process                             | 6           | 0.010231055 | GSK3B, CASP3, BAG1, KDR, SOD2, MMP9                    | 4.428659341     | 0.998480004 | 0.510384113 | 0.507148714 |
| 5                  | response to hypoxia                                                  | 5           | 0.001572636 | DPP4, PKLR, APAF1, CASP3, SOD2                         | 9.762790698     | 0.629578740 | 0.141761896 | 0.140863247 |

|    |                                             |   |             |                                         |              |             |             |             |
|----|---------------------------------------------|---|-------------|-----------------------------------------|--------------|-------------|-------------|-------------|
| 6  | response to drug                            | 5 | 0.011774848 | STAT1, CASP3,<br>SORD, SOD2,<br>DHODH   | 5.523684211  | 0.999432358 | 0.510384113 | 0.507148714 |
| 7  | apoptotic process                           | 5 | 0.082856627 | APAF1, STAT1,<br>CASP3, BAG1,<br>S100A9 | 2.961552028  | 1.000000000 | 1.000000000 | 0.995238095 |
| 8  | response to<br>cadmium ion                  | 4 | 5.13E-05    | GPI, DTYMK,<br>SORD, SOD2               | 53.734400000 | 0.031873060 | 0.018270541 | 0.018154722 |
| 9  | canonical<br>glycolysis                     | 4 | 5.79E-05    | GPI, PKLR,<br>ALDOA, HK1                | 51.667692308 | 0.035882536 | 0.018270541 | 0.018154722 |
| 10 | cellular response<br>to insulin<br>stimulus | 4 | 0.001467686 | KAT2B, PKLR,<br>PDPK1, STAT1            | 17.446233766 | 0.604177870 | 0.141761896 | 0.140863247 |

| Cell component |                          |    |          |                                                                                                                                                                                                                                                                                                                                                                                                                                            |             |             |             |             |
|----------------|--------------------------|----|----------|--------------------------------------------------------------------------------------------------------------------------------------------------------------------------------------------------------------------------------------------------------------------------------------------------------------------------------------------------------------------------------------------------------------------------------------------|-------------|-------------|-------------|-------------|
| 1              | cytosol                  | 27 | 3.83E-08 | GPI, CDA, GSK3B,<br>DTYMK, GMPR2,<br>GMPR, HK1,<br>TYMP, CASP3,<br>BAG1, LTA4H,<br>HRAS, GSTM2,<br>PKLR, APAF1,<br>PDPK1, STAT1,<br>SORD, SULT2B1,<br>FKBP1A, UCK2,<br>GNPDA1,<br>MTHFD1, GSTA3,<br>PAH, ALDOA,<br>S100A9<br>CFD, GPI, HEXB,<br>DPP4, HINT1,<br>CTSG, LTA4H,<br>CTSF, TGM3,<br>GSTM2, PKLR,<br>APAF1, SORD,<br>GP1BA, SOD2,<br>MMP9, SULT2B1,<br>FKBP1A, ACE2,<br>BST1, GNPDA1,<br>MTHFD1, GSTA3,<br>PAH, ALDOA,<br>S100A9 | 2.968615385 | 0.000003791 | 0.000001896 | 0.000001838 |
| 2              | extracellular<br>exosome | 26 | 6.49E-09 |                                                                                                                                                                                                                                                                                                                                                                                                                                            | 3.371213091 | 0.000000642 | 0.000000642 | 0.000000623 |

|                    |                          |    |             |                                                                                                                                                                                                                                |                   |             |             |             |
|--------------------|--------------------------|----|-------------|--------------------------------------------------------------------------------------------------------------------------------------------------------------------------------------------------------------------------------|-------------------|-------------|-------------|-------------|
| 3                  | cytoplasm                | 23 | 0.011173698 | GPI, GSK3B,<br>GSTM2, PDPK1,<br>STAT1, NR1H2,<br>GMPR2, GMPR,<br>AKR1C2, GP1BA,<br>DHODH, SELP,<br>SULT2B1,<br>FKBP1A, ACE2,<br>HINT1, GNPDA1,<br>MAP2, CASP3,<br>BAG1, LTA4H,<br>HRAS, TGM3<br>SELP, CFD, GPI,<br>ACE2, HEXB, | 1.605331291       | 0.671238473 | 0.184366009 | 0.178779160 |
| 4                  | extracellular<br>space   | 12 | 7.35E-04    | MMP3, SORD,<br>CTSG, CTSF,<br>ALDOA, S100A9,<br>MMP9<br>SELP, FKBP1A,<br>DPP4, GPI,                                                                                                                                            | 3.247037862       | 0.070246687 | 0.024269732 | 0.023534286 |
| 5                  | membrane                 | 11 | 0.064958049 | MTHFD1, PDPK1,<br>HEXB, SORD,<br>GP1BA, ALDOA,<br>HRAS<br>CFD, CDA, ACE2,                                                                                                                                                      | 1.822400000       | 0.998704974 | 0.714538540 | 0.692885857 |
| 6                  | extracellular<br>region  | 10 | 0.026083119 | TPSB2, MMP3,<br>KDR, CTSG,<br>ALDOA, S100A9,<br>MMP9                                                                                                                                                                           | 2.263850932       | 0.926942055 | 0.368889830 | 0.357711351 |
| 7                  | membrane raft            | 5  | 0.002257309 | DPP4, ACE2,<br>CASP3, KDR, HK1                                                                                                                                                                                                 | 8.846601942       | 0.200465996 | 0.055868403 | 0.054175421 |
| 8                  | GMP reductase<br>complex | 2  | 0.005370442 | GMPR2, GMPR                                                                                                                                                                                                                    | 364.48000000<br>0 | 0.413220716 | 0.106334749 | 0.103112484 |
| 9                  | I band                   | 2  | 0.060081655 | KAT2B, ALDOA                                                                                                                                                                                                                   | 31.693913043      | 0.997832683 | 0.714538540 | 0.692885857 |
| Molecular function |                          |    |             |                                                                                                                                                                                                                                |                   |             |             |             |
| 1                  | ATP binding              | 9  | 0.064446413 | GSK3B, DTYMK,<br>UCK2, PKLR,<br>MTHFD1, APAF1,<br>PDPK1, KDR, HK1<br>CDA, ACE2,                                                                                                                                                | 2.032494983       | 0.999999160 | 1.000000000 | 1.000000000 |
| 2                  | zinc ion binding         | 8  | 0.050491432 | NR1H2, MMP3,<br>SORD, LTA4H,<br>S100A9, MMP9                                                                                                                                                                                   | 2.310487596       | 0.999981174 | 0.963927335 | 0.963927335 |

|    |                                    |   |             |                                             |              |             |             |             |
|----|------------------------------------|---|-------------|---------------------------------------------|--------------|-------------|-------------|-------------|
| 3  | identical protein binding          | 7 | 0.020630994 | DPP4, APAF1, STAT1, SORD, ALDOA, SOD2, MMP9 | 3.155327103  | 0.987447369 | 0.618929811 | 0.618929811 |
| 4  | serine-type endopeptidase activity | 6 | 8.38E-04    | DPP4, CFD, TPSB2, MMP3, CTSG, MMP9          | 7.944000000  | 0.161493072 | 0.175625793 | 0.175625793 |
| 5  | protein homodimerization activity  | 6 | 0.059542136 | FKBP1A, DPP4, CDA, GSTM2, STAT1, HEXB       | 2.774958904  | 0.999997481 | 1.000000000 | 1.000000000 |
| 6  | metallopeptidase activity          | 4 | 0.001672627 | ACE2, MMP3, LTA4H, MMP9                     | 16.672592593 | 0.296400284 | 0.175625793 | 0.175625793 |
| 7  | catalytic activity                 | 4 | 0.017211343 | HINT1, GMPR2, TGM3, DHODH                   | 7.183404255  | 0.973900728 | 0.602397016 | 0.602397016 |
| 8  | kinase activity                    | 4 | 0.032720072 | GSK3B, DTYMK, PKLR, PDPK1                   | 5.603651452  | 0.999075394 | 0.763468349 | 0.763468349 |
| 9  | endopeptidase activity             | 3 | 0.010728738 | ACE2, MMP3, MMP9                            | 18.756666667 | 0.896191576 | 0.563258723 | 0.563258723 |
| 10 | serine-type peptidase activity     | 3 | 0.014402129 | DPP4, CFD, TPSB2                            | 16.077142857 | 0.952472071 | 0.602397016 | 0.602397016 |

**Table S3.** KEGG pathway enrichment of top 50 candidate targets for compound 1

|   | Pathway                                     | Gene Number | P-Value     | Genes                            | Fold Enrichment | Bonferroni  | Benjamini   | FDR         |
|---|---------------------------------------------|-------------|-------------|----------------------------------|-----------------|-------------|-------------|-------------|
| 1 | Amino sugar and nucleotide sugar metabolism | 4           | 0.003024544 | GPI, GNPDA1, HEXB, HK1           | 13.33139535     | 0.349579433 | 0.180545582 | 0.175459791 |
| 2 | Pyrimidine metabolism                       | 5           | 0.00319425  | CDA, DTYMK, UCK2, TYMP, DHODH    | 7.919640801     | 0.365113735 | 0.180545582 | 0.175459791 |
| 3 | Thyroid hormone signaling pathway           | 5           | 0.005085791 | KAT2B, GSK3B, PDPK1, STAT1, HRAS | 6.955510617     | 0.51520299  | 0.180545582 | 0.175459791 |
| 4 | Glycolysis / Gluconeogenesis                | 4           | 0.007731444 | GPI, PKLR, ALDOA, HK1            | 9.550850399     | 0.667837537 | 0.219573008 | 0.213387853 |
| 5 | Insulin signaling pathway                   | 5           | 0.009618378 | GSK3B, PKLR, PDPK1, HRAS, HK1    | 5.796258847     | 0.74650739  | 0.227634957 | 0.221222705 |
| 6 | Hepatitis B                                 | 5           | 0.011393711 | APAF1, STAT1, CASP3, HRAS, MMP9  | 5.516439455     | 0.803519972 | 0.231129557 | 0.224618865 |
| 7 | Fructose and mannose metabolism             | 3           | 0.016076433 | SORD, ALDOA, HK1                 | 14.99781977     | 0.89988168  | 0.285356682 | 0.277318465 |

|    |                                                    |   |             |                                     |             |             |             |             |
|----|----------------------------------------------------|---|-------------|-------------------------------------|-------------|-------------|-------------|-------------|
| 8  | Bladder cancer                                     | 3 | 0.025676545 | HRAS, MMP9,<br>TYMP                 | 11.70561543 | 0.975120114 | 0.388274793 | 0.377337475 |
| 9  | Carbon metabolism                                  | 4 | 0.031157553 | GPI, PKLR,<br>ALDOA, HK1            | 5.6628936   | 0.988832693 | 0.388274793 | 0.377337475 |
| 10 | Proteoglycans in<br>cancer                         | 5 | 0.032811954 | PDPK1, CASP3,<br>KDR, HRAS,<br>MMP9 | 3.999418605 | 0.991239061 | 0.388274793 | 0.377337475 |
| 11 | Endometrial cancer                                 | 3 | 0.039813053 | GSK3B, PDPK1,<br>HRAS               | 9.229427549 | 0.99687735  | 0.434881039 | 0.422630869 |
| 12 | Hepatitis C                                        | 4 | 0.046932234 | GSK3B, PDPK1,<br>STAT1, HRAS        | 4.811330652 | 0.998914632 | 0.476026947 | 0.462617737 |
| 13 | Prolactin signaling<br>pathway                     | 3 | 0.069422219 | GSK3B, STAT1,<br>HRAS               | 6.75958074  | 0.999963451 | 0.62318301  | 0.605628559 |
| 14 | Biosynthesis of<br>amino acids                     | 3 | 0.071136431 | PKLR, PAH,<br>ALDOA                 | 6.665697674 | 0.99997187  | 0.62318301  | 0.605628559 |
| 15 | Metabolism of<br>xenobiotics by<br>cytochrome P450 | 3 | 0.074606417 | GSTM2, GSTA3,<br>AKR1C2             | 6.485543683 | 0.999983467 | 0.62318301  | 0.605628559 |

**Table S4.** The top 10 involved indications of top 50 candidate targets for compound **1**

| Term                 | Gene<br>Number | P-Value  | Genes                                                                                                                                                                                                                      | Fold<br>Enrichment | Bonferroni  | Benjamini   | FDR         |
|----------------------|----------------|----------|----------------------------------------------------------------------------------------------------------------------------------------------------------------------------------------------------------------------------|--------------------|-------------|-------------|-------------|
| Type 2 diabetes      | 24             | 1.48E-07 | CFD, GSK3B, GSTM2,<br>APAF1, STAT1, HEXB,<br>NR1H2, MMP3, GP1BA,<br>SOD2, MMP9, TYMP,<br>SELP, FKBP1A, DPP4,<br>ACE2, MTHFD1, MAP2,<br>CASP3, BAG1, KDR,<br>CTSG, LTA4H, CTSF<br>CDA, GSK3B, GSTM2,<br>APAF1, STAT1, MMP3, | 3.078925505        | 9.99E-05    | 9.99E-05    | 9.57E-05    |
| Lung cancer          | 13             | 5.37E-07 | AKR1C2, SOD2, MMP9,<br>MTHFD1, GSTA3,<br>CASP3, HRAS<br>SELP, GSTM2,                                                                                                                                                       | 6.181648215        | 3.63E-04    | 1.81E-04    | 1.74E-04    |
| Atherosclerosis      | 9              | 2.59E-05 | MTHFD1, NR1H2,<br>MMP3, GP1BA, LTA4H,<br>SOD2, MMP9<br>SELP, GSTM2,                                                                                                                                                        | 7.148744642        | 0.017337796 | 0.005829876 | 0.005579778 |
| Colorectal<br>cancer | 9              | 9.39E-05 | MTHFD1, CASP3,<br>MMP3, KDR, SOD2,<br>HRAS, MMP9                                                                                                                                                                           | 5.957287201        | 0.061512553 | 0.015870704 | 0.01518986  |



|                              |    |          |                                                                                          |             |             |             |             |
|------------------------------|----|----------|------------------------------------------------------------------------------------------|-------------|-------------|-------------|-------------|
| Esophageal<br>adenocarcinoma | 8  | 1.87E-04 | CDA, GSK3B, MTHFD1,<br>APAF1, CASP3, MMP3,<br>KDR, MMP9                                  | 6.426854949 | 0.118916271 | 0.019789692 | 0.018940726 |
| Chronic renal<br>failure     | 12 | 2.02E-04 | SELP, SULT2B1,<br>FKBP1A, CDA, BST1,<br>GSTM2, NR1H2, CASP3,<br>MMP3, KDR, SOD2,<br>MMP9 | 3.738938266 | 0.12759701  | 0.019789692 | 0.018940726 |
| Plasma HDL<br>cholesterol    | 7  | 2.05E-04 | KAT2B, GSK3B, PDPK1,<br>STAT1, NR1H2, HRAS,<br>MMP9                                      | 7.927099703 | 0.129373351 | 0.019789692 | 0.018940726 |
| Breast cancer                | 9  | 3.58E-04 | KAT2B, GSK3B,<br>GSTM2, MTHFD1,<br>STAT1, KDR, AKR1C2,<br>SOD2, MMP9                     | 4.899236193 | 0.215088459 | 0.026904542 | 0.025750353 |
| Angina                       | 3  | 6.35E-04 | MMP3, GP1BA, MMP9<br>GSK3B, MTHFD1,                                                      | 76.90316206 | 0.348904425 | 0.042896268 | 0.041056043 |
| Alzheimer's<br>disease       | 7  | 9.58E-04 | NR1H2, MMP3, CTSG,<br>SOD2, MMP9                                                         | 5.927470949 | 0.476853106 | 0.053965217 | 0.051650141 |

---
